# Supplementary material for: Orbital-based insights into parallel-displaced and twisted conformations in π–π interactions
Source: Royal Society of Chemistry journal article supplement (doi:10.1039/c3cp51077h), 2013-01-01
Supplement: c3cp51077h.pdf [file c3cp51077h.pdf]

Supporting Information

Orbital-based insights into parallel-displaced and twisted conformations in  $\pi$ - $\pi$  interactions

Patricia B. Lutz and Craig A. Bayse\*

Department of Chemistry and Biochemistry, Old Dominion University, Hampton Boulevard, Norfolk, Virginia 23529

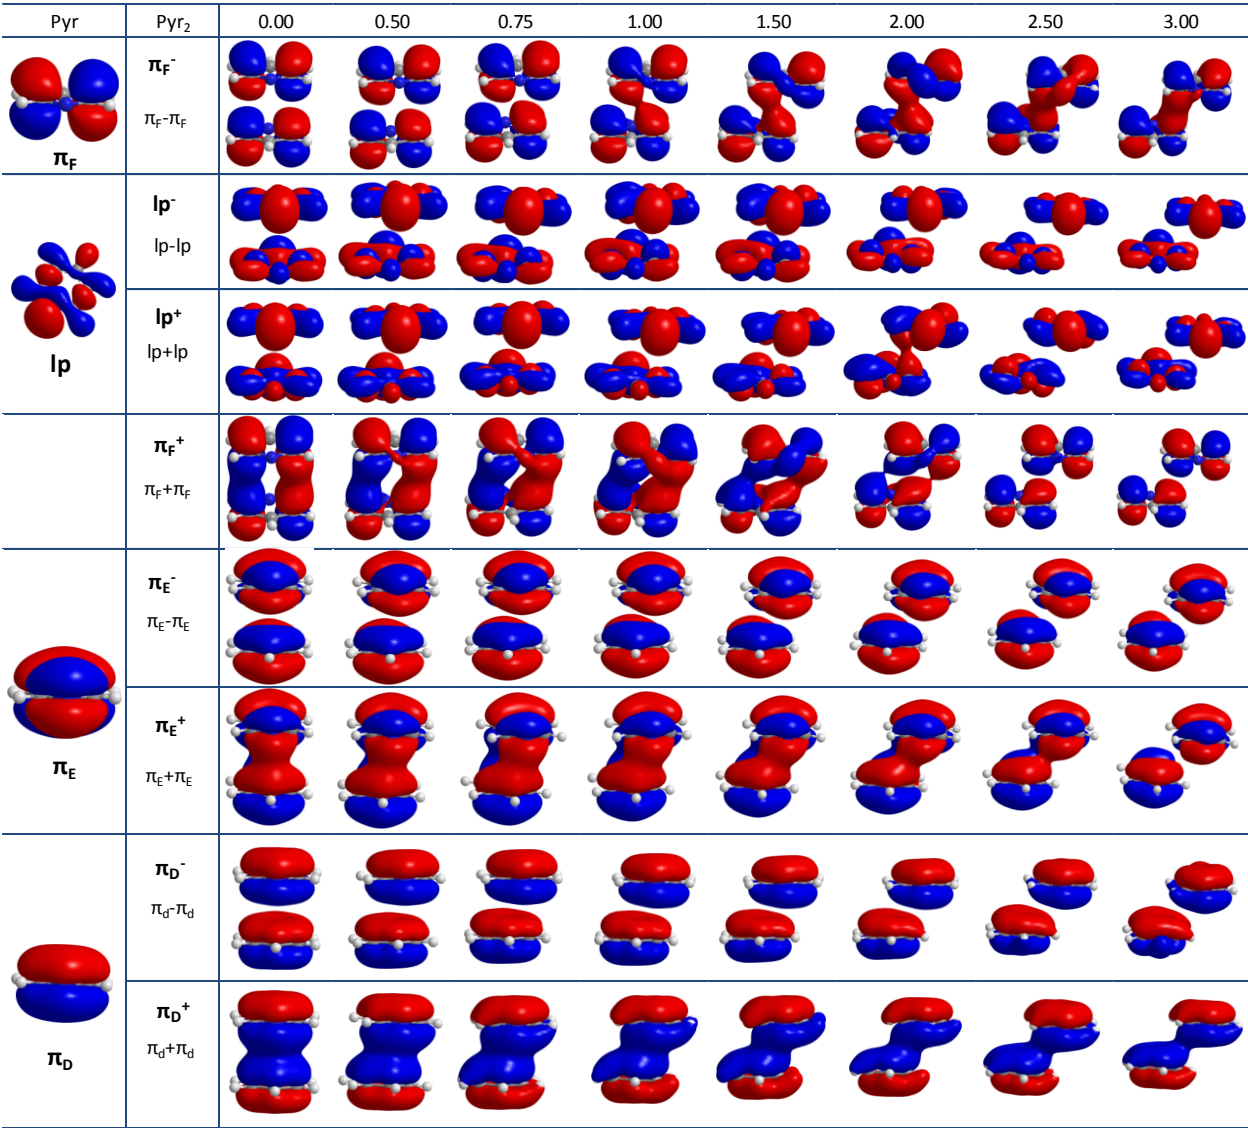

Figure S1. The orbital representations of the top four  $\pi$  molecular orbitals of Pyr<sub>2</sub> as a function of  $R_{slip}$ .

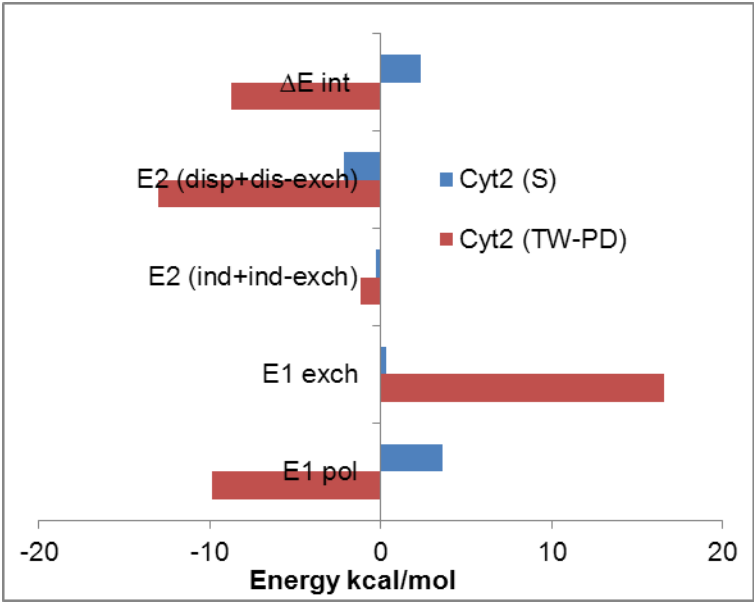

**Figure S2.** DF-DFT-SAPT energy contributions for both Cyt<sub>2</sub> (S) and Cyt<sub>2</sub> (TW-PD).

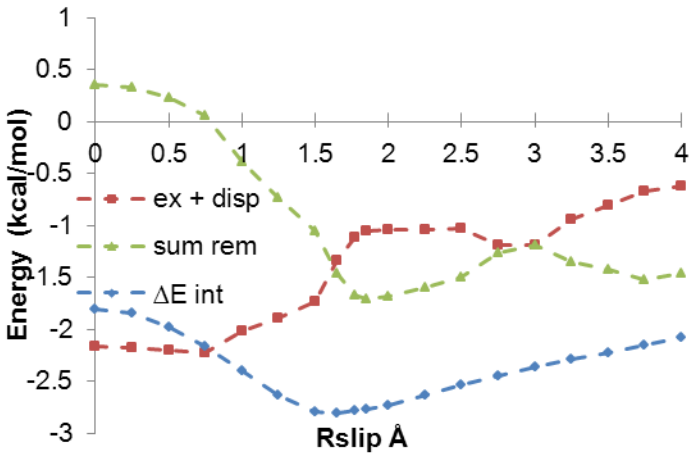

**Figure S3.** Plot of the DF-DFT-SAPT  $E_{\text{int}}$ , the sum of the  $E_{\text{exch}}^{(1)}$  and  $E_{\text{disp}}^{(2)}$  contributions, and the sum of the remaining  $E_{\text{pol}}^{(1)}$ ,  $E_{\text{ind}}^{(2)}$ ,  $E_{\text{ind-disp}}^{(2)}$ ,  $E_{\text{exch-disp}}^{(2)}$  and  $\delta(\text{HF})$  terms for Bz<sub>2</sub> plotted as a function of  $R_{\text{slip}}$ .

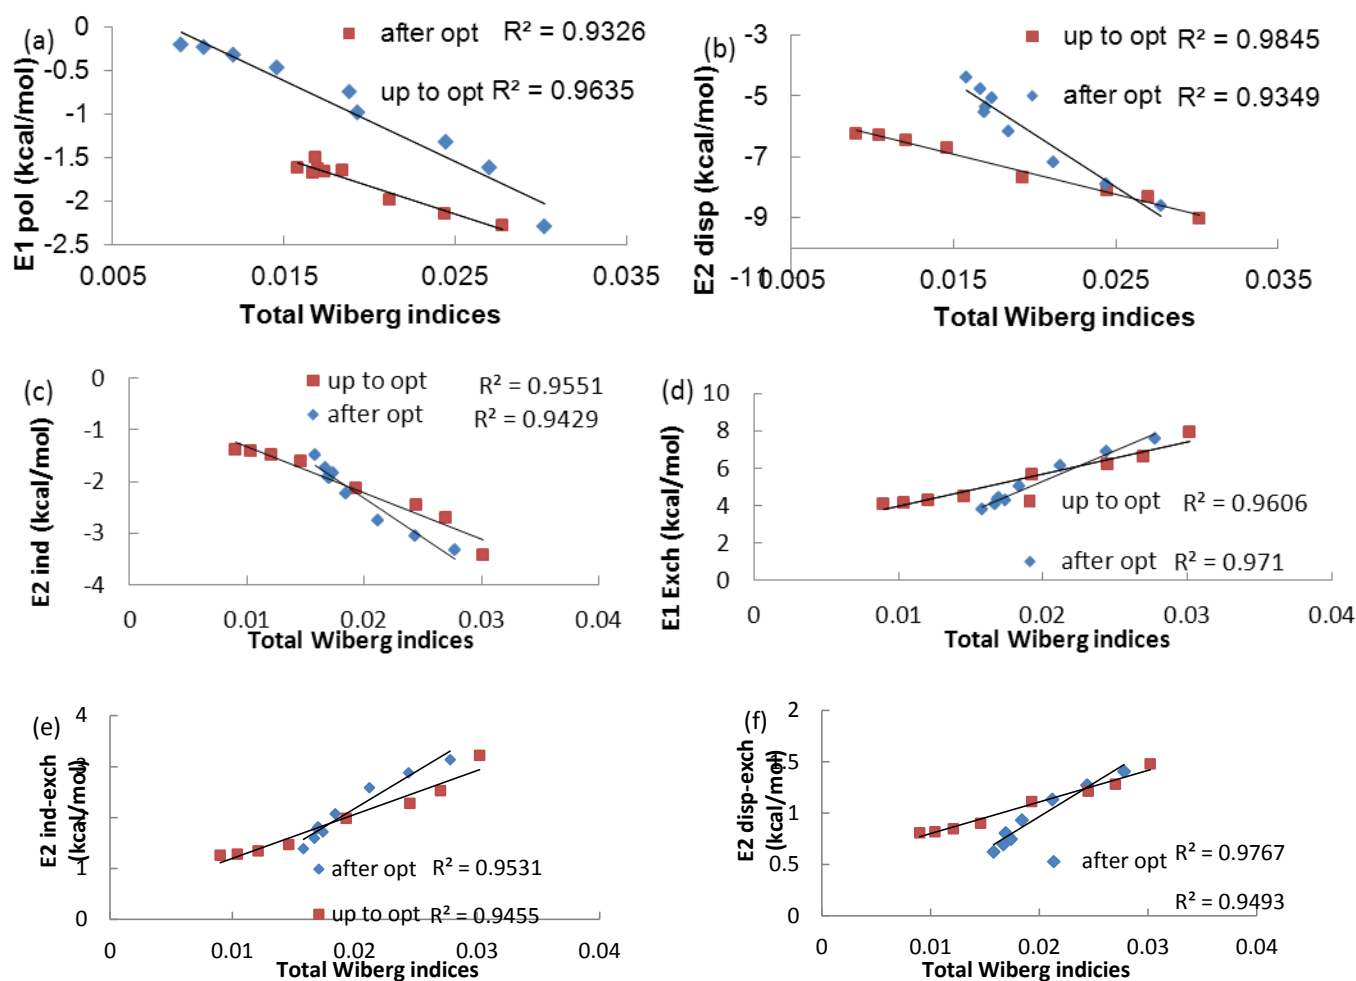

**Figure S4.** DF-DFT-SAPT energy contributions for  $Bz_2$  plotted as a function of the total intermolecular Wiberg bond indices which displays a change in slope before and after the minimum reflecting a change in the type of monomer MOs involved in inter-ring bonding. (a) Plot of  $E_{pol}^{(1)}$  as a function of the total WBI. (b) Plot of  $E_{disp}^{(2)}$  plotted as function of total WBI. (c) Plot of  $E_{ind}^{(2)}$  as a function of the total WBI. (d) Plot of  $E_{exch}^{(1)}$  as a function of the total WBI. (e) Plot of  $E_{ind-exch}^{(2)}$  as a function of the total WBI. f, Plot of  $E_{disp-exch}^{(2)}$  as a function of the total WBI.

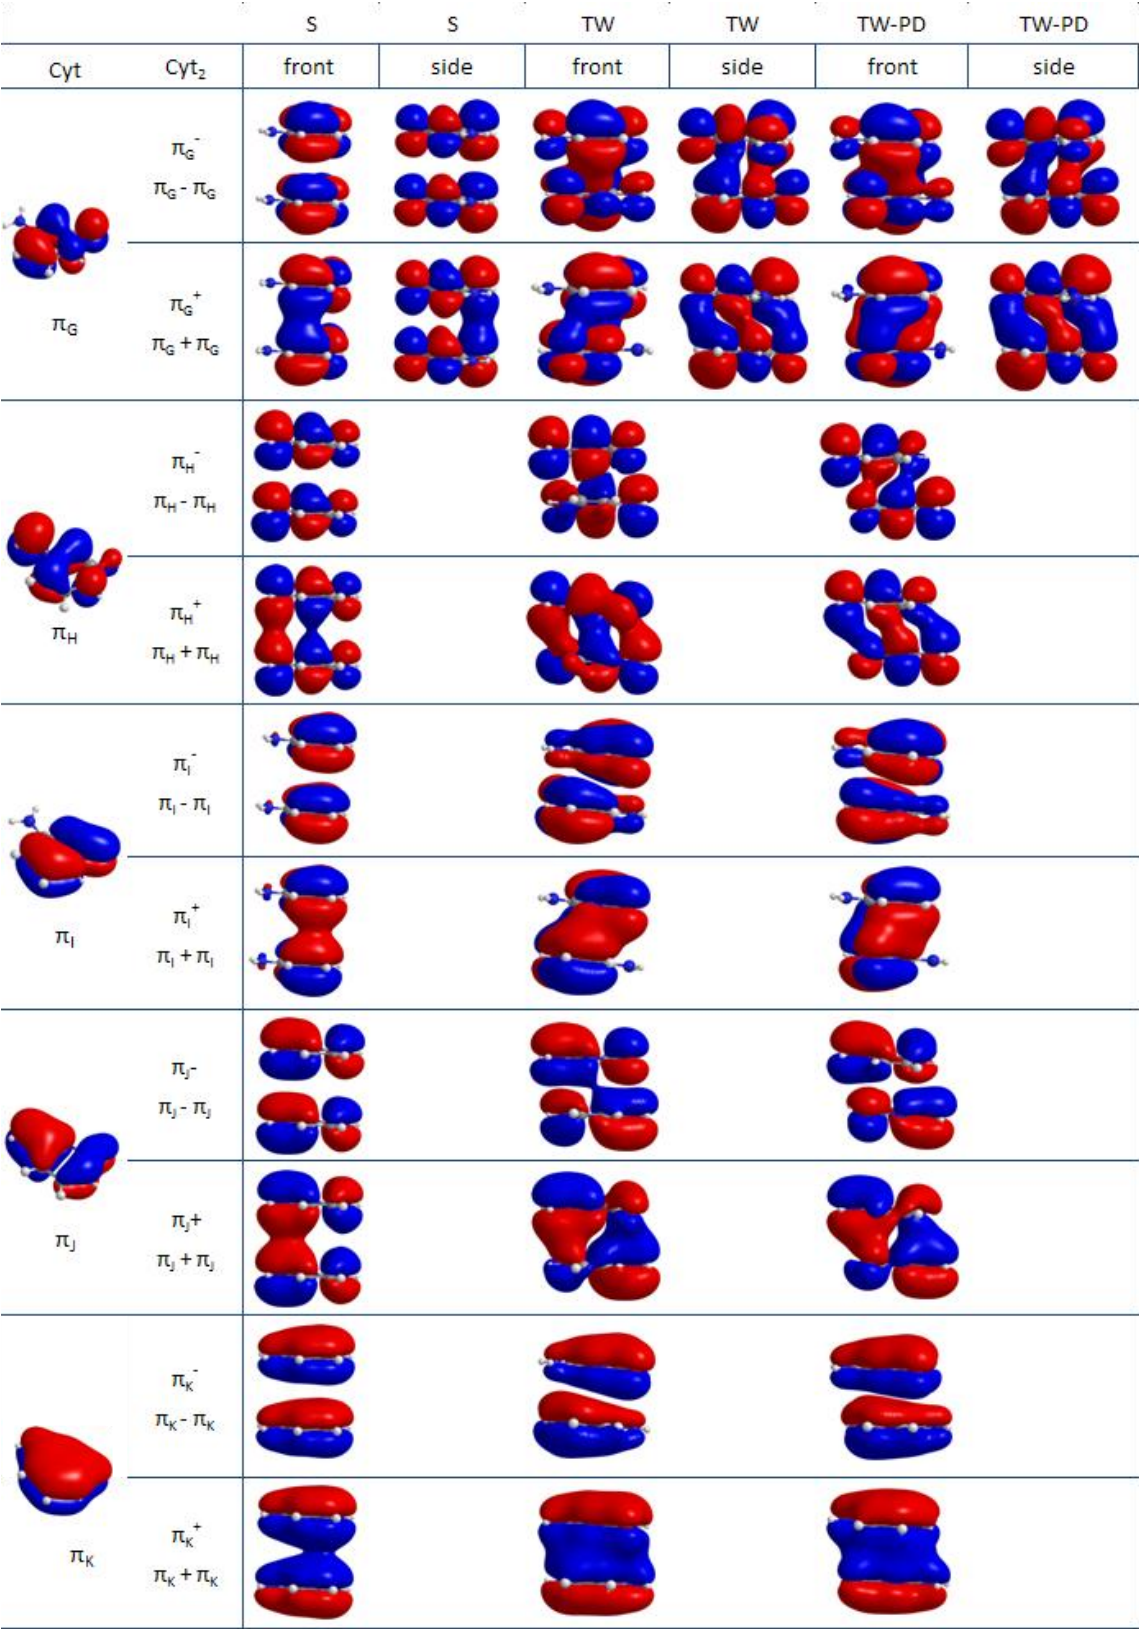

Figure S5. The orbital representations of the 10  $\pi$  orbitals for Cyt<sub>2</sub>.
